# Supplementary material for: Arthroscopic All-in Technique Combined with High Tibial Osteotomy for Osteoarthritis with Posterior Root Tear of the Medial Meniscus
Source: Research Square preprint supplement (doi:10.21203/rs.3.rs-7840788/v1), 2025-10-30

Clinical Trial Rapid Review Approval of the Medical Ethics  
Committee of the Third Hospital of Hebei Medical University

Ethical approval number 2024-092-1

|                                             |                                                                                                                                                                                                                                                                                                                                                                                           |                                    |                                                 |
|---------------------------------------------|-------------------------------------------------------------------------------------------------------------------------------------------------------------------------------------------------------------------------------------------------------------------------------------------------------------------------------------------------------------------------------------------|------------------------------------|-------------------------------------------------|
| project name                                | Posterior suture anchor arthroscopic meniscectomy with high tibial osteotomy for meniscal posterior root<br>Study on short-and medium-term clinical efficacy of tearing                                                                                                                                                                                                                   |                                    |                                                 |
| Whether our hospital declares independently | <input checked="" type="checkbox"/> Yes <input type="checkbox"/> No                                                                                                                                                                                                                                                                                                                       |                                    |                                                 |
| Program version number                      | 1. 0                                                                                                                                                                                                                                                                                                                                                                                      | Version number of informed consent | Waiver of written informed consent applications |
| Lead researcher                             | Dong Jiangtao                                                                                                                                                                                                                                                                                                                                                                             | Review time                        | 2024-08-19                                      |
| Status of applications                      | <input checked="" type="checkbox"/> New project, Re-examination of amendments approved, Review of amendments                                                                                                                                                                                                                                                                              |                                    |                                                 |
| Type of project                             | Medical department project (self-financed)                                                                                                                                                                                                                                                                                                                                                |                                    |                                                 |
| Source of project                           | <input type="checkbox"/> government ( <input type="checkbox"/> National key projects and provincial and ministerial level projects <input type="checkbox"/> Municipal level project) <input type="checkbox"/> Enterprise name unit<br><input type="checkbox"/> Academic groups (including various societies, foundations, etc.) <input checked="" type="checkbox"/> self-financing Other: |                                    |                                                 |
| audit-review file                           | 1. First instance application form<br>2. Research plan (1.0, 2024-06-30)<br>3. Waiver of written informed consent application<br>4. Copy of PI resume and GCP training certificate<br>5. Commitment letter of ethical review of scientific research projects<br>6. Medical Service Project approval form                                                                                  |                                    |                                                 |
| Review comments                             | <input checked="" type="checkbox"/> agree<br><br>The mouth is revised and consented to the mouth is not consented to                                                                                                                                                                                                                                                                      |                                    |                                                 |

Declaration: The composition and operation of this ethics committee are in accordance with the relevant international ethics guidelines and Chinese laws and regulations.

2024 3月19日

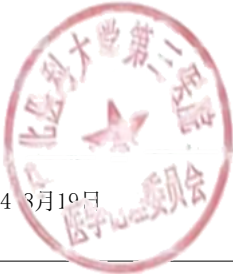

Supplement: Supplementary file 1 [file 43844c8cfe9aa1bd136ff22f.pdf]
